# Supplementary material for: A simulated single ventilator/dual patient ventilation strategy for acute respiratory distress syndrome during the COVID-19 pandemic
Source: PubMed Central journal article supplement (PMC7481711; doi:10.1098/rsos.200585), 2020-08-24
Supplement: rsos200585supp14.pdf [file rsos200585supp14.pdf]

# Electronic Supplementary Materials

Data for Plots 3-6(b)

## General description

Each CSV file contains the necessary vector data to produce the figure described in its title. Each filename consists of the following structure:

`Fig<NUMBER>_<SPLITTER_TYPE>_<FIGURE_DESCRIPTION>_<CONTENTS_INFORMATION>.csv`, where:

- **NUMBER**: figure number (3b, 4b, 5, or 6b)
- **SPLITTER\_TYPE**: standardSplitter or modifiedSplitter
- **FIGURE\_DESCRIPTION**: Description relating to figure caption in manuscript.
- **CONTENTS\_INFORMATION**: Description of the specific contents of the file.

Thirteen files have been submitted.

## Descriptions per files

### [Figure 3b (4 files)]

Each file contains the Pressure, Tidal Volume and Flow variables for a specific patient.

- `Fig3B_standardSplitter_PressureVolumeFlow_PatientModelsAtoD_LungModelA`: Variables for a patient with a lung model A (healthy, compliance at 0.054 L/cmH<sub>2</sub>O)
- `Fig3B_standardSplitter_PressureVolumeFlow_PatientModelsAtoD_LungModelB`: Variables for a patient with a lung model B (mild ARDS, 20% reduction with respect to A)
- `Fig3B_standardSplitter_PressureVolumeFlow_PatientModelsAtoD_LungModelC`: Variables for a patient with a lung model C (moderate, 30% reduction)
- `Fig3B_standardSplitter_PressureVolumeFlow_PatientModelsAtoD_LungModelD`: Variables for a patient with a lung model D (severe, 40% reduction)

### [Figure 4b (3 files)]

Each file contains Pressure, Tidal volume and Flow for two patients paired under the standard splitter.

`Fig4B_standardSplitter_comparison_PressureVolumeFlow_dissimilarPatientModels_Patients_A_B`: Variables for patient pair A-B.

`Fig4B_standardSplitter_comparison_PressureVolumeFlow_dissimilarPatientModels_Patients_A_C`: Variables for patient pair A-C.

`Fig4B_standardSplitter_comparison_PressureVolumeFlow_dissimilarPatientModels_Patients_A_D`: Variables for patient pair A-D.

### [Figure 5b (3 files)]

Each file contains Pressure, Tidal volume and Flow for two patients paired under the modified splitter.

Fig5B\_modifiedSplitter\_normaliseTidalVolume\_dissimilarPatientModels\_Patients\_A\_B: Variables for patient pair A-B where tidal volume was normalised using the proposed Modified Splitter.

Fig5B\_modifiedSplitter\_normaliseTidalVolume\_dissimilarPatientModels\_Patients\_A\_C: Variables for patient pair A-C where tidal volume was normalised using the proposed Modified Splitter.

Fig5B\_modifiedSplitter\_normaliseTidalVolume\_dissimilarPatientModels\_Patients\_A\_D: Variables for patient pair A-D where tidal volume was normalised using the proposed Modified Splitter.

### [Figure 6b (3files)]

Each file contains Pressure, Tidal volume and Flow for two patients with a lung model C (C-C) paired, where the tidal volume was altered by the modified splitter.

Fig6B\_modifiedSplitter\_adjustTidalVolume\_Patients\_C\_C\_baseline: Variables for pair C-C, where no alteration was made.

Fig6B\_modifiedSplitter\_adjustTidalVolume\_Patients\_C\_C\_decrease: Variables for pair C-C, where the Tidal Volume of one patient was decreased by 30% whilst maintaining the other patient constant.

Fig6B\_modifiedSplitter\_adjustTidalVolume\_Patients\_C\_C\_increase: Variables for pair C-C, where the Tidal Volume of one patient was increased by 30% whilst maintaining the other patient constant.

## Data description per column

Each file contains a time column and data columns, each of them with a descriptive heading. Headings contain the following structure:

<VARIABLE>\_<PATIENT\_PAIR>\_<PATIENT>, where:

VARIABLE: Control, Pressure (in cmH<sub>2</sub>O), ModifiedVol (Tidal Volume in mL), and Flow (in L/min)

PATIENT\_PAIR: Includes all pairwise combinations of letters A,B,C and D (corresponding to the Lung Compliance Models described in the manuscript).

PATIENT: Variable corresponding to the specific patient in a pair. For example, Pressure\_AD\_1A corresponds to patient 1, with a lung model A.
